# Supplementary material
Source: publisher figshare collection journal article supplement (https://acs.figshare.com/ndownloader/files/5456186)
Supplement: Supplementary file 1 [file 5456186]

# Supporting Information

## **A Multifunctional PB@mSiO<sub>2</sub>-PEG/DOX Nanoplatfor m for Combined Photothermal-Chemotherapy of Tumor**

Yun Yan Su<sup>a#</sup>, Zhaogang Teng<sup>a#</sup>, Hui Yao<sup>b</sup>, Shou Ju Wang<sup>a</sup>, Ying Tian<sup>a</sup>, Yun Lei Zhang<sup>a</sup>, Wen Fei Liu<sup>a</sup>, Wei Tian<sup>a</sup>, Li Juan Zheng<sup>a</sup>, Nan Lu<sup>a</sup>, Qian Qian Ni<sup>a</sup>, Xiao Dan Su<sup>c</sup>, Yu Xia Tang<sup>a</sup>, Jing Sun<sup>a</sup>, Ying Liu<sup>a</sup>, Jiang Wu<sup>a</sup>, Gui Fen Yang<sup>a\*</sup>, Guang Ming Lu<sup>a\*</sup>, Long Jiang Zhang<sup>a\*</sup>

<sup>#</sup>Drs. Su and Teng had equal contributions for this work.

### AFFILIATIONS

<sup>a</sup> Department of Medical Imaging, Jinling Hospital, Medical School of Nanjing University, Nanjing 210002, P.R. China

<sup>b</sup> Department of Hepatopancreatobiliary Surgery, Drum Tower Hospital, Medical School of Nanjing University, Nanjing 210008, P.R. China

<sup>c</sup> Key Laboratory for Organic Electronics & Information Displays and Institute of Advanced Materials, Nanjing University of Posts and Telecommunications, Nanjing 210046, P.R. China

\* Correspondence to:

Long Jiang Zhang, Email: [kevinzhj@163.com](mailto:kevinzhj@163.com) or Guang Ming Lu, email: [cjr.luguangming@vip.163.com](mailto:cjr.luguangming@vip.163.com) or Gui Fen Yang, [nstlygf@163.com](mailto:nstlygf@163.com).

## Materials and Methods

### *In vitro* MR and PA imaging

The longitudinal relaxation time  $T_1$  (s) of PB@mSiO<sub>2</sub>-PEG at different concentrations of 0, 62.5, 125, 250, 500, 1000, 2000 and 10000  $\mu\text{g mL}^{-1}$  was measured in 1% agarose by a 3.0 Tesla scanner (TIM Trio, Siemens Medical Solutions, Erlangen, Germany) using the inversion-recovery pulse sequence method.  $T_1$  map imaging parameters: repetition time (TR) = 15 ms, echo time (TE) = 2 ms, field of view (FOV) =  $160 \times 160 \text{ mm}^2$ , matrix size =  $256 \times 256$ , and slice thickness = 3 mm.  $T_1$  map and  $T_1$  color map images were processed. Then, the  $r_1$  relaxivities of PB ( $r_1$ ,  $\mu\text{g mL}^{-1} \text{ ms}^{-1}$ ) was calculated using  $T_1$  measurements of different concentrations of the NPs in 1% agarose using the following equation<sup>1</sup>:  $r_1 = (1/T_1 - 1/T_1(0))/[\text{PB}]$

Where [PB] represents the concentration of PB@mSiO<sub>2</sub>-PEG ( $\mu\text{g mL}^{-1}$ ),  $1/T_1(0)(\text{s}^{-1})$  is the relaxation rate without paramagnetic species, and  $1/T_1(\text{ms}^{-1})$  is the relaxation rate with paramagnetic species.

To investigate the PA property of PB@mSiO<sub>2</sub>-PEG nanocubes, PB@mSiO<sub>2</sub>-PEG in PBS at the concentrations from 660 to 2000  $\mu\text{g mL}^{-1}$  was detected by Innovative In vivo Photoacoustic 3-D Tomographic Imaging System (Endra Nexus 128, USA). And the excitation wavelength of the laser for PAI was chosen at 713 nm.

## Results

PB compound have the ability to serve as a great  $T_1$ -weighted MR contrast agent. We determined the longitudinal and transverse relativities ( $r_1$  values) of the PB@mSiO<sub>2</sub>-PEG nanocubes at serial dilutions under a MR scanner (**Fig. S7**). The

concentration-normalized relaxivity values were measured to be  $r_1 = 2.063 \mu\text{g mL}^{-1} \text{ ms}^{-1}$  within concentration of  $1000 \mu\text{g mL}^{-1}$ , while beyond the concentration, no distinctive linear relationship between concentration of PB@mSiO<sub>2</sub>-PEG nanocubes and the relaxation rate (**Fig. S7**) were observed. The results were in excellent agreement with those reported in literature.<sup>2-3</sup> With a high  $r_1$  relaxivity, PB@mSiO<sub>2</sub>-PEG nanocubes may serve as a great T1-weighted MR contrast agent. The PA intensities of all the samples of PB@mSiO<sub>2</sub>-PEG nanocubes in aqueous solution increased linearly with increasing nanoparticles concentrations (**Fig. S7**), suggesting they are suitable for further *in vivo* PA imaging. With a good accumulation of the PB@mSiO<sub>2</sub>-PEG/DOX nanoplateforms in cancer cells, PB@mSiO<sub>2</sub>-PEG nanocubes have potential as an excellent MR and PA imaging probes to track its accumulation in tumor, so as to diagnose the tumor before treatments.

### Figures and Figure legends

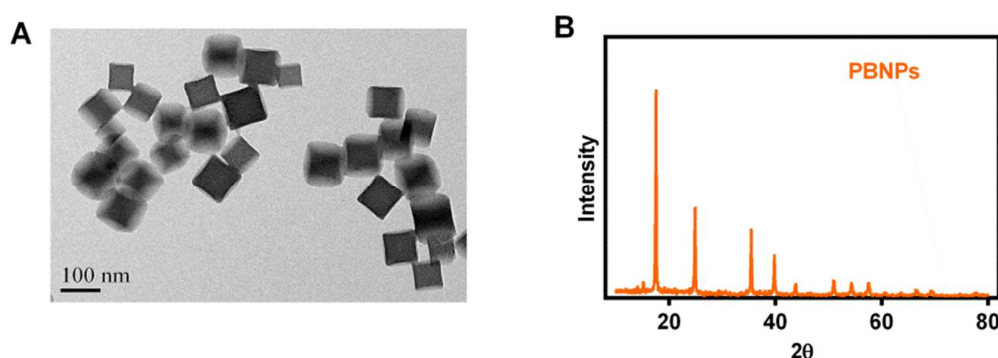

**Fig. S1** characterization of PB nanocubes. (A) TEM image. (B) Powder X-ray diffraction pattern for PB nanocubes.

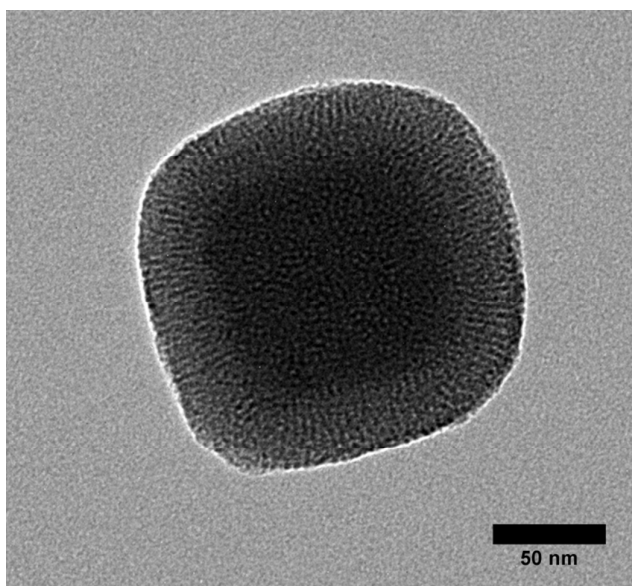

**Fig. S2** HRTEM image of the PB@mSiO<sub>2</sub> nanocube.

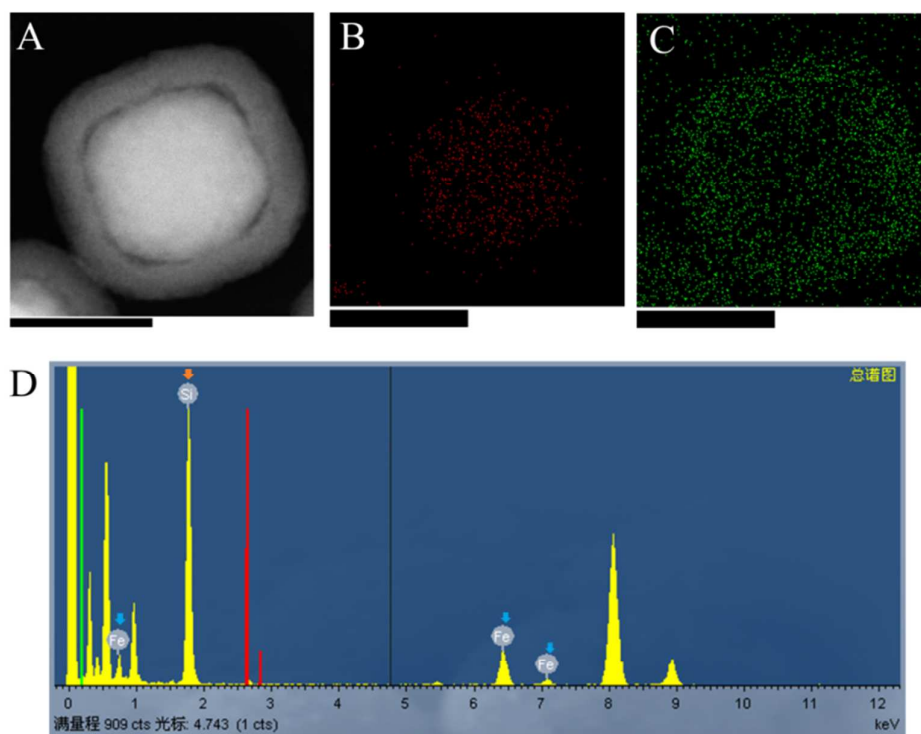

**Fig. S3** (A)TEM image; (B and C) elemental mapping of Fe (red) and Si (green) atoms in the PB@mSiO<sub>2</sub>; (D) EDX spectrum of Fe (orange arrow) and Si (blue arrows) atoms. Scale bar: 90 nm. Spectroscopy of PB@mSiO<sub>2</sub> analysis shows the ratio of

Fe to Si elements is 11.43/88.57

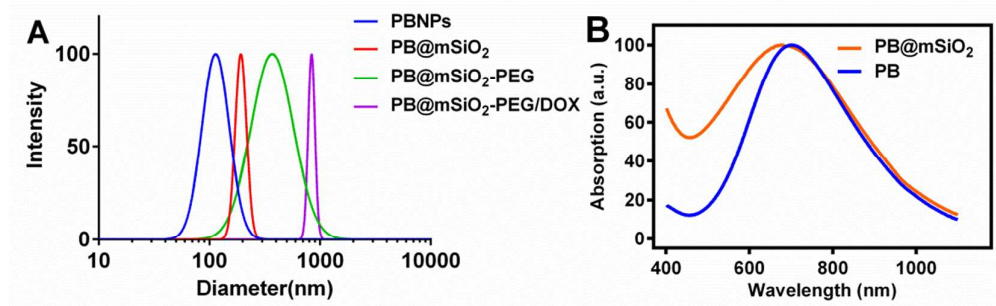

**Fig. S4** (A) DLS of PB, PB@mSiO<sub>2</sub>, PB@mSiO<sub>2</sub>-PEG, PB@mSiO<sub>2</sub>-PEG/DOX nanocubes;

(B) UV-vis-NIR absorbance spectra of PB and PB@mSiO<sub>2</sub> nanocubes.

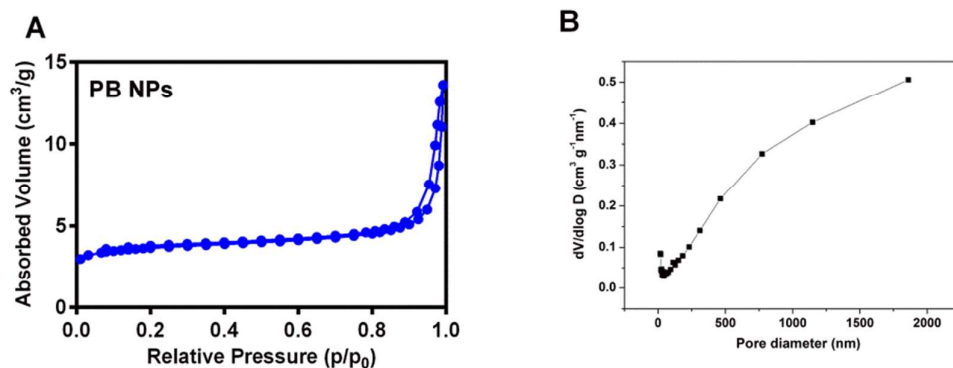

**Fig. S5** (A) N<sub>2</sub> gas adsorption-desorption isotherms and (B) the corresponding pore size

distribution for PB nanocubes.

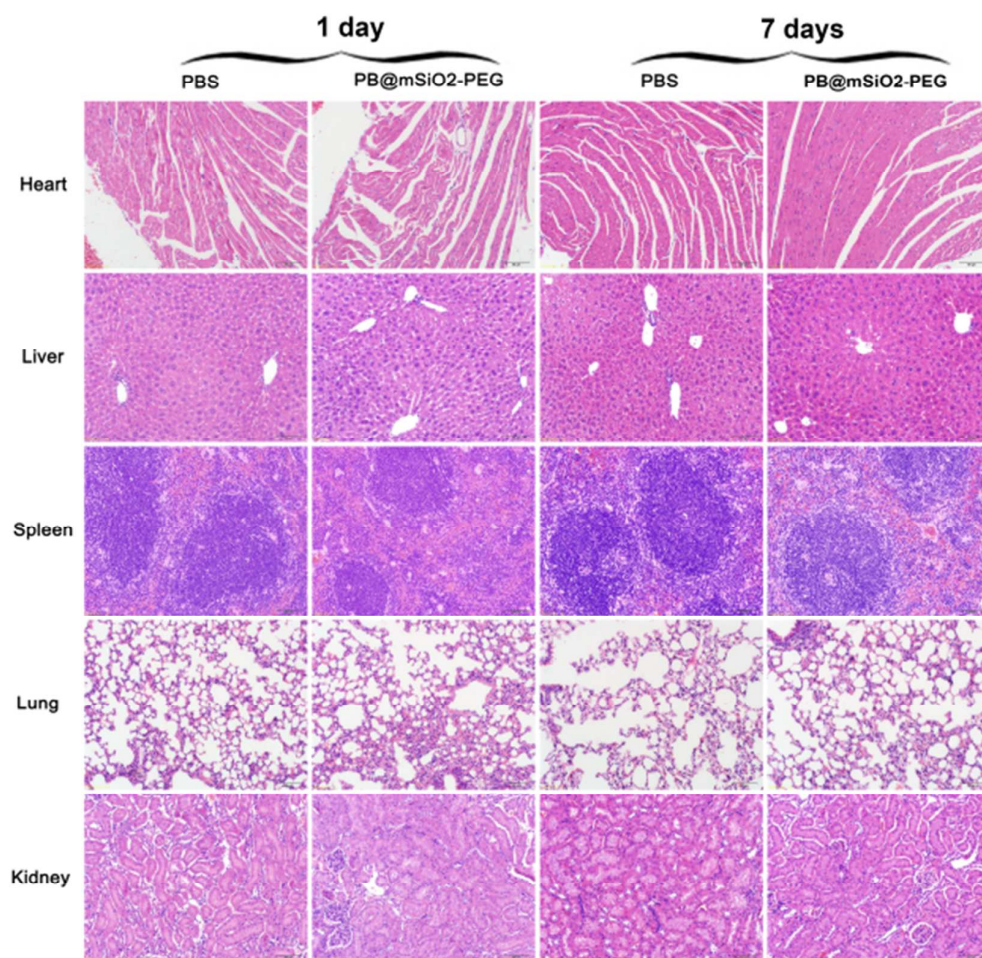

**Fig. S6** Representative hematoxylin and eosin stained histological images from the major organs (heart, liver, spleen, lung, and kidneys) of mice. Scale bar: 50  $\mu$ m



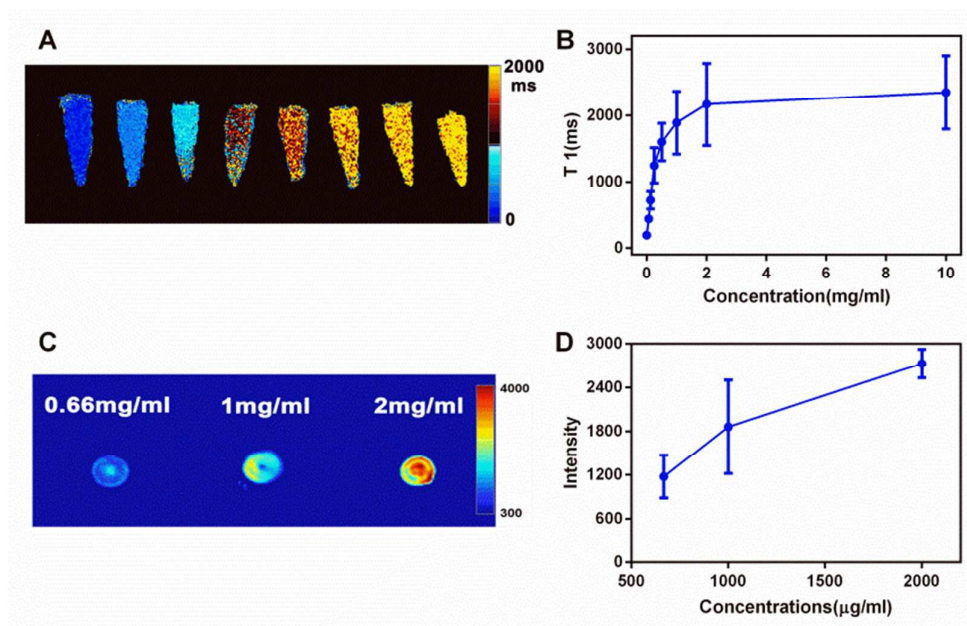

**Fig. S7** *In vitro* MR and PA imaging. (A) and (B) T1 maps of different concentrations of PB@mSiO<sub>2</sub>-PEG nanocubes and their relative signals. (C) and (D) PA imaging and density of aqueous dispersions contained different concentrations of PB@mSiO<sub>2</sub>-PEG nanocubes.

## Reference

1. Mi, P.; Dewi, N.; Yanagie, H.; Kokuryo, D.; Suzuki, M.; Sakurai, Y.; Li, Y.; Aoki, I.; Ono, K.; Takahashi, H.; Cabral, H.; Nishiyama, N.; Kataoka, K., Hybrid Calcium Phosphate-Polymeric Micelles Incorporating Gadolinium Chelates for Imaging-Guided Gadolinium Neutron Capture Tumor Therapy. *ACS Nano* **2015**, *9*, 5913-5921.
2. Cheng, L.; Gong, H.; Zhu, W.; Liu, J.; Wang, X.; Liu, G.; Liu, Z., Pegylated Prussian Blue Nanocubes as a Theranostic Agent for Simultaneous Cancer Imaging and Photothermal Therapy. *Biomaterials* **2014**, *35*, 9844-9852.
3. Jing, L.; Liang, X.; Deng, Z.; Feng, S.; Li, X.; Huang, M.; Li, C.; Dai, Z., Prussian Blue Coated Gold Nanoparticles for Simultaneous Photoacoustic/Ct Bimodal Imaging and Photothermal Ablation of Cancer. *Biomaterials* **2014**, *35*, 5814-5821.
